# Supplementary material for: Recycling of allylic alkylation Pd catalysts containing phosphine-imidazoline ligands in ionic liquids
Source: Royal Society of Chemistry journal article supplement (doi:10.1039/c2gc35732a), 2012-01-01
Supplement: c2gc35732a.pdf [file c2gc35732a.pdf]

## Supporting Information

# Recycling of Allylic Alkylation Pd Catalysts Containing Phosphine-Imidazoline Ligand in Ionic Liquids

Verónica de la Fuente,<sup>a</sup> Nicolas Fleury-Brégeot,<sup>a</sup> Sergio Castellón<sup>b\*</sup> and  
Carmen Claver<sup>a\*</sup>

### Table of contents

|                                                                                                                                                                                                             |   |
|-------------------------------------------------------------------------------------------------------------------------------------------------------------------------------------------------------------|---|
| <b>General Methods:</b> .....                                                                                                                                                                               | 3 |
| <b>General Procedure for Palladium-Catalysed Allylic Alkylation in Ionic Liquid; Thermal Conditions:</b> .....                                                                                              | 3 |
| <b>Palladium-Catalysed Allylic Alkylation using ligand 3 in the IL 16; Thermal Conditions:</b>                                                                                                              | 3 |
| <b>General Procedure for Palladium-Catalysed Allylic Alkylation in Ionic Liquid; Microwave irradiation:</b> .....                                                                                           | 4 |
| <b>Palladium-Catalysed Allylic Alkylation using ligand 3 in the Ionic Liquid 16; Microwave irradiation (One run):</b> .....                                                                                 | 4 |
| <b>Reactivity of ionic liquid with palladium precursors:</b> .....                                                                                                                                          | 4 |
| <i>Synthesis of complex 17:</i> .....                                                                                                                                                                       | 4 |
| <b>Figure 1.</b> <sup>1</sup> H NMR spectra of reaction of [Pd(η <sup>3</sup> -C <sub>3</sub> H <sub>5</sub> )Cl] <sub>2</sub> with IL <b>13</b> and KOAc. ....                                             | 5 |
| <b>Figure 2.</b> <sup>13</sup> C- <sup>1</sup> H NMR spectra of reaction of [Pd(η <sup>3</sup> -C <sub>3</sub> H <sub>5</sub> )Cl] <sub>2</sub> with IL <b>13</b> and KOAc...                               | 5 |
| <b>Figure 3.</b> <sup>1</sup> H NMR spectra of reaction of [Pd(η <sup>3</sup> -C <sub>3</sub> H <sub>5</sub> )Cl] <sub>2</sub> with IL <b>13</b> and KOAc after crystallization in EtOAc/Hexane (1:5). .... | 6 |

|                                                                                                                                                                                                                                                                                                                                                                                                                                                                                                                                                                                                                                                                                                                                                                                                                      |    |
|----------------------------------------------------------------------------------------------------------------------------------------------------------------------------------------------------------------------------------------------------------------------------------------------------------------------------------------------------------------------------------------------------------------------------------------------------------------------------------------------------------------------------------------------------------------------------------------------------------------------------------------------------------------------------------------------------------------------------------------------------------------------------------------------------------------------|----|
| <b>Figure 4.</b> 2D COSY ( $^1\text{H}$ - $^1\text{H}$ ) NMR spectra of reaction of $[\text{Pd}(\eta^3\text{-C}_3\text{H}_5)\text{Cl}]_2$ with IL <b>13</b> and KOAc. ....                                                                                                                                                                                                                                                                                                                                                                                                                                                                                                                                                                                                                                           | 6  |
| <b>Figure 5.</b> Expanded 2D COSY ( $^1\text{H}$ - $^1\text{H}$ ) NMR spectra of reaction of $[\text{Pd}(\eta^3\text{-C}_3\text{H}_5)\text{Cl}]_2$ with IL <b>13</b> and KOAc. ....                                                                                                                                                                                                                                                                                                                                                                                                                                                                                                                                                                                                                                  | 7  |
| <b>Figure 6.</b> $^{13}\text{C}$ - $\{^1\text{H}\}$ NMR spectra of reaction of $[\text{Pd}(\eta^3\text{-C}_3\text{H}_5)\text{Cl}]_2$ with IL <b>13</b> and KOAc after crystallization with EtOAc/hexane (1:5). ....                                                                                                                                                                                                                                                                                                                                                                                                                                                                                                                                                                                                  | 7  |
| <b>Figure 7.</b> ESI-TOF chromatogram for complex <b>17</b> . ....                                                                                                                                                                                                                                                                                                                                                                                                                                                                                                                                                                                                                                                                                                                                                   | 8  |
| <b>Table 1.</b> ESI-TOF data for complex <b>17</b> . ....                                                                                                                                                                                                                                                                                                                                                                                                                                                                                                                                                                                                                                                                                                                                                            | 8  |
| <i>Reactivity of ligand 3 in IL 13 under basic conditions:</i> .....                                                                                                                                                                                                                                                                                                                                                                                                                                                                                                                                                                                                                                                                                                                                                 | 9  |
| <b>Figure 8.</b> Mixture of complexes formed by reaction of ligand <b>3</b> and $[\text{Pd}(\eta^3\text{-C}_3\text{H}_5)\text{Cl}]_2$ in ionic liquid <b>13</b> and KOAc. ....                                                                                                                                                                                                                                                                                                                                                                                                                                                                                                                                                                                                                                       | 9  |
| <b>Figure 9.</b> $^1\text{H}$ NMR of complex <b>18</b> at rt. ....                                                                                                                                                                                                                                                                                                                                                                                                                                                                                                                                                                                                                                                                                                                                                   | 9  |
| <b>Figure 10.</b> $^{31}\text{P}$ - $\{^1\text{H}\}$ NMR of complex <b>18</b> at rt. ....                                                                                                                                                                                                                                                                                                                                                                                                                                                                                                                                                                                                                                                                                                                            | 10 |
| <b>Figure 11.</b> $^{31}\text{P}$ - $\{^1\text{H}\}$ NMR spectra: a) Isolated complex <b>18</b> ; b) Complex mixture of <b>18</b> and <b>19</b> obtained by reaction of ligand <b>3</b> with $[\text{Pd}(\eta^3\text{-C}_3\text{H}_5)\text{Cl}]_2$ in ionic liquid <b>13</b> and KOAc. .                                                                                                                                                                                                                                                                                                                                                                                                                                                                                                                             | 10 |
| <i>Reactivity of ligand 3 in ILs 13, 14 and 16 under basic conditions:</i> .....                                                                                                                                                                                                                                                                                                                                                                                                                                                                                                                                                                                                                                                                                                                                     | 11 |
| <b>Figure 12.</b> $^{31}\text{P}$ - $\{^1\text{H}\}$ NMR spectra: a) $^{31}\text{P}$ - $\{^1\text{H}\}$ NMR spectra of the isolated complex <b>18</b> at rt; b) $^{31}\text{P}$ - $\{^1\text{H}\}$ NMR spectra of the mixture of complexes <b>18</b> and <b>19</b> at $-40^\circ\text{C}$ obtained by reaction of ligand <b>3</b> and $[\text{Pd}(\eta^3\text{-C}_3\text{H}_5)\text{Cl}]_2$ in the IL <b>13</b> ; c) $^{31}\text{P}$ - $\{^1\text{H}\}$ NMR spectra of complex <b>18</b> obtained by reaction of ligand <b>3</b> and $[\text{Pd}(\eta^3\text{-C}_3\text{H}_5)\text{Cl}]_2$ in the IL <b>16</b> ; d) $^{31}\text{P}$ - $\{^1\text{H}\}$ NMR spectra of complex <b>18</b> obtained by reaction of ligand <b>3</b> and $[\text{Pd}(\eta^3\text{-C}_3\text{H}_5)\text{Cl}]_2$ in the IL <b>14</b> . .... | 11 |

### General Methods:

All reactions were carried out under an argon atmosphere using Standard Schlenk techniques.  $^1\text{H}$ ,  $^{13}\text{C}\{^1\text{H}\}$ ,  $^{31}\text{P}\{^1\text{H}\}$  and  $^{19}\text{F}\{^1\text{H}\}$  NMR spectra were recorded on a Varian Gemini spectrometer at 400 MHz. Chemical shifts were reported relative to tetramethylsilane for  $^1\text{H}$  and  $^{13}\text{C}\{^1\text{H}\}$  as internal reference,  $\text{H}_3\text{PO}_4$  85% for  $^{31}\text{P}\{^1\text{H}\}$ , and trichlorofluoromethane for  $^{19}\text{F}\{^1\text{H}\}$  as external references. Elemental analyses were carried out on a Carlo Erba Microanalyser EA 1108. VG-Autospect equipment was used for FAB mass spectral analyses with 3-nitrobenzylalcohol as matrix. EI mass spectra were obtained on an HP 5989 A spectrometer at an ionizing voltage of 70eV. Conversion was measured by NMR spectrometry. The enantiomeric excesses was measured by HPLC (OD-H column)

### General Procedure for Palladium-Catalysed Allylic Alkylation in Ionic Liquid; Thermal Conditions:

In an inerted Schlenk tube are introduced  $[\text{Pd}(\eta^3\text{-C}_3\text{H}_5)\text{Cl}]_2$  (1.84 mg, 5  $\mu\text{mol}$ , 2mol%) and the phosphine-imidazoline ligand (0.011 mmol) in 2 mL of the corresponding IL. The resulting mixture is heated at 85°C for 20 minutes under nitrogen to preform the Pd complex. After cooling to rt, *rac*-1,3-diphenylprop-2-en-1-yl acetate (62.5 mg, 250  $\mu\text{mol}$ ), dimethyl malonate (750  $\mu\text{mol}$ ), BSA (185  $\mu\text{L}$ , 750  $\mu\text{mol}$ ) and KOAc (0.5 mg, 2mol%) are successively added. Then, the reaction mixture was stirred at 45 °C for 24 h. After cooling to rt, the products are extracted from the ionic liquid using dry degassed toluene (3 x 5mL), filtered over celite and the solvent removed. The conversion of the reaction was measured after removing the solvent by  $^1\text{H}$  NMR of the crude mixture. Enantiomeric excesses were determined from the residue by HPLC<sup>i</sup> on a OD-H column (0.5 mL/min, n-hexane/isopropyl alcohol, 99:1): (*R*)-**PI**  $R_t=23$  min, (*S*)-**PI**  $R_t=25$  min.

### Palladium-Catalysed Allylic Alkylation using ligand 3 in the IL 16; Thermal Conditions:

In an inerted Schlenk tube are introduced  $[\text{Pd}(\eta^3\text{-C}_3\text{H}_5)\text{Cl}]_2$  (1.84 mg, 5  $\mu\text{mol}$ , 2mol%) and the ligand **3** (0.011 mmol) in 2 mL of [2,3-dmbim][BF<sub>4</sub>] (**16**). The resulting mixture is heated at 85°C for 20 minutes under nitrogen to preform the Pd complex. After cooling to rt, *rac*-1,3-diphenylprop-2-en-1-yl acetate (62.5 mg, 250  $\mu\text{mol}$ ), dimethyl malonate (750  $\mu\text{mol}$ ), BSA (185  $\mu\text{L}$ , 750  $\mu\text{mol}$ ) and KOAc (0.5 mg, 2mol%) are successively added. Then, the reaction mixture was stirred at 45 °C for 24 h. After cooling to rt, the products are extracted from the ionic liquid using dry degassed toluene (3 x 5mL), filtered over celite and the solvent removed. The conversion of the reaction was measured after removing the solvent by  $^1\text{H}$  NMR of the crude

mixture. Product was purified by column chromatography hexane/ethyl acetate (4:1) obtaining 65 mg of product as yellow oil (Yield = 82 %)ii

**General Procedure for Palladium-Catalysed Allylic Alkylation in Ionic Liquid; Microwave irradiation:**

In an inerted Schlenk tube are introduced  $[\text{Pd}(\eta^3\text{-C}_3\text{H}_5\text{Cl})_2]$  (1.84 mg, 5  $\mu\text{mol}$ , 2mol%) and the phosphine-imidazoline ligand (0.011 mmol) in  $[\text{2,3-dmbim}][\text{BF}_4]$  (2 mL). Then, *rac*-1,3-diphenylprop-2-en-1-yl acetate (62.5 mg, 250  $\mu\text{mol}$ ), dimethyl malonate (750  $\mu\text{mol}$ ), BSA (185  $\mu\text{L}$ , 750  $\mu\text{mol}$ ) and KOAc (0.5 mg, 2mol%) are successively added. The resulting solution is then put under microwave (P=8 watts) for 1 hour. After cooling to rt, the products are extracted from the ionic liquid using dry degassed toluene (3 x 5mL), filtered over celite and the solvent removed. The ionic liquid is kept under vacuum for 3 hrs under stirring to remove the traces of organic solvent and reused for another batch reaction by simply adding *rac*-1,3-diphenylprop-2-en-1-yl acetate (31  $\mu\text{L}$ , 250  $\mu\text{mol}$ , 1 eq.), dimethyl malonate (86  $\mu\text{L}$ , 3 eq), BSA (152  $\mu\text{L}$ , 3 eq.) and (0.5 mg, 2 mol %) KOAc.

**Palladium-Catalysed Allylic Alkylation using ligand 3 in the Ionic Liquid 16; Microwave irradiation (One run):**

In an inerted Schlenk tube are introduced  $[\text{Pd}(\eta^3\text{-C}_3\text{H}_5\text{Cl})_2]$  (1.84 mg, 5  $\mu\text{mol}$ , 2mol%) and the phosphine-imidazoline ligand **3** (0.011 mmol) in 2 mL of  $[\text{2,3-dmbim}][\text{BF}_4]$  (**16**). Then, *rac*-1,3-diphenylprop-2-en-1-yl acetate (62.5 mg, 250  $\mu\text{mol}$ ), dimethyl malonate (750  $\mu\text{mol}$ ), BSA (185  $\mu\text{L}$ , 750  $\mu\text{mol}$ ) and KOAc (0.5 mg, 2mol%) are successively added. The resulting solution is then put under microwave (P=8 watts) for 1 hour. After cooling to rt, the products are extracted from the ionic liquid using dry degassed toluene (3 x 5mL), filtered over celite and the solvent removed. The conversion of the reaction was measured after removing the solvent by  $^1\text{H}$  NMR of the crude mixture. Product was purified by column chromatography hexane/ethyl acetate (4:1) obtaining 62 mg of product as yellow oil (Yield = 78 %)iii

**Reactivity of ionic liquid with palladium precursors:**

Synthesis of complex 17:

Into a schlenk tube under nitrogen was introduced the palladium precursor  $[\text{Pd}(\eta^3\text{-C}_3\text{H}_5\text{Cl})_2]$  (50 mg, 0.136 mmol) and the  $[\text{bmim}][\text{BF}_4]$  (**13**) (0.5 mL). Then, KOAc (14 mg, 0.14 mmol) was introduced and the reaction mixture was heated at 45 °C for 16 hours. After that, a  $^1\text{H}$  NMR spectra was acquired at room temperature observing the formation of a palladium-carbene

complex **17**. The unreacted ionic liquid was removed by precipitation in a mixture of ethyl acetate/hexane (1:5)  $^1\text{H NMR}$  ( $\text{CDCl}_3$ , 400 MHz,  $\delta$  ppm): 6.82 (q,  $^4J=1.6$  Hz, 4H, CH), 5.38 (br, 1H, CH), 4.60 (br, 2H,  $\text{CH}_2$ ), 4.07 (m, 4H,  $\text{CH}_2$ ), 3.72 (s, 6H,  $\text{CH}_3$ ), 3.22 (br, 2H,  $\text{CH}_2$ ), 1.71 (m, 4H,  $\text{CH}_2$ ), 1.24 (m, 4H,  $\text{CH}_2$ ), 0.84 (t,  $^3J=7.3$  Hz, 6H,  $\text{CH}_3$ ).  $^{13}\text{C}\{-^1\text{H}\}$  NMR ( $\text{CDCl}_3$ , 100.6 MHz,  $\delta$  ppm): 180.0 (NCN), 122.2 (CH), 120.9 (CH), 111.4 (CH), 63.1 ( $\text{CH}_2$ ), 51.0 ( $\text{CH}_2$ ), 33.4 ( $\text{CH}_2$ ), 20.0 ( $\text{CH}_2$ ), 14.0 ( $\text{CH}_3$ ).

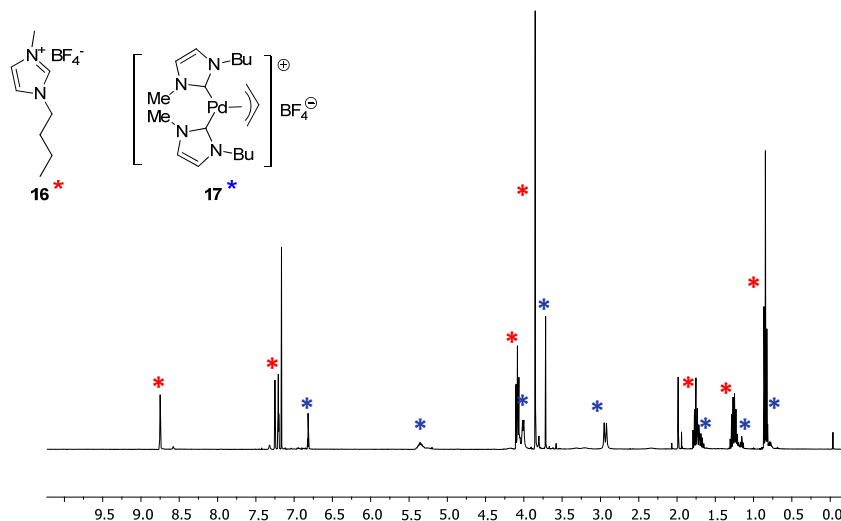

**Figure 1.**  $^1\text{H}$  NMR spectra of reaction of  $[\text{Pd}(\eta^3\text{-C}_3\text{H}_5)\text{Cl}]_2$  with IL **13** and KOAc.

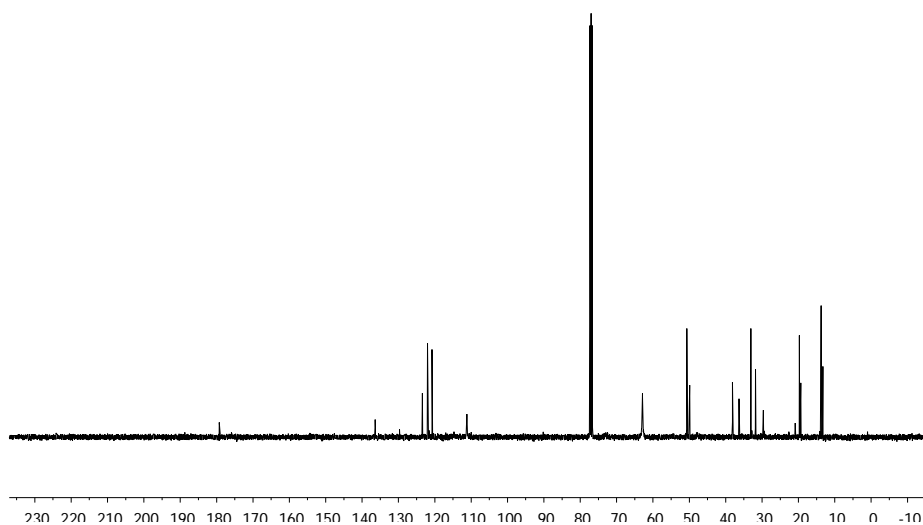

**Figure 2.**  $^{13}\text{C}\{-^1\text{H}\}$  NMR spectra of reaction of  $[\text{Pd}(\eta^3\text{-C}_3\text{H}_5)\text{Cl}]_2$  with IL **13** and KOAc.

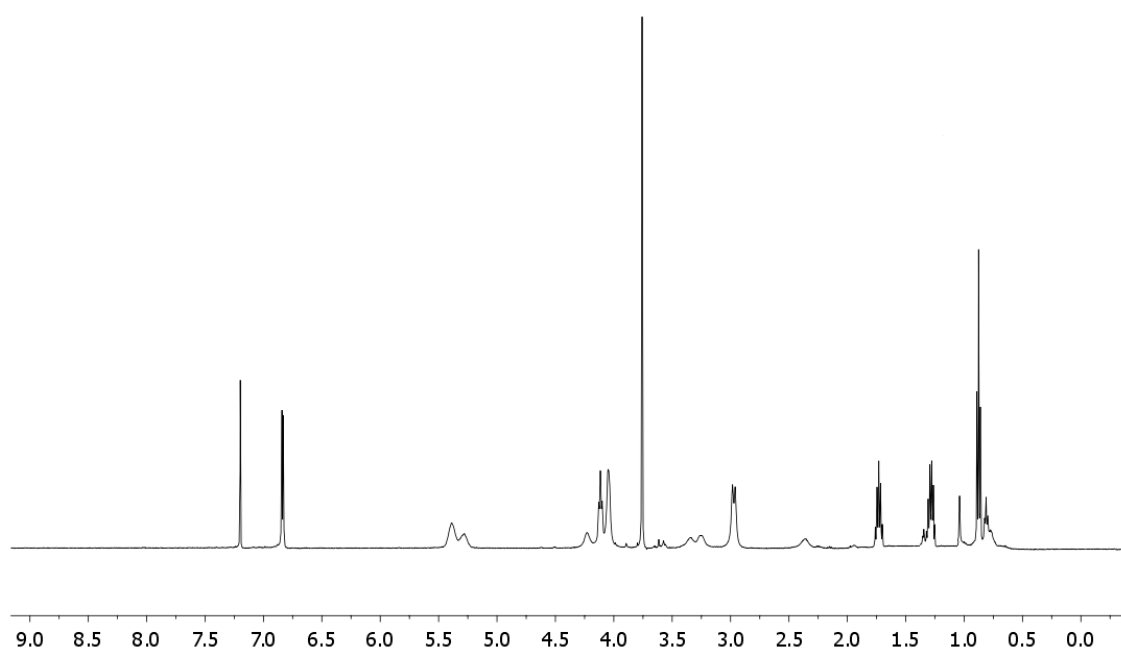

**Figure 3.**  $^1\text{H}$  NMR spectra of reaction of  $[\text{Pd}(\eta^3\text{-C}_3\text{H}_5)\text{Cl}]_2$  with IL **13** and KOAc after crystallization in EtOAc/Hexane (1:5).

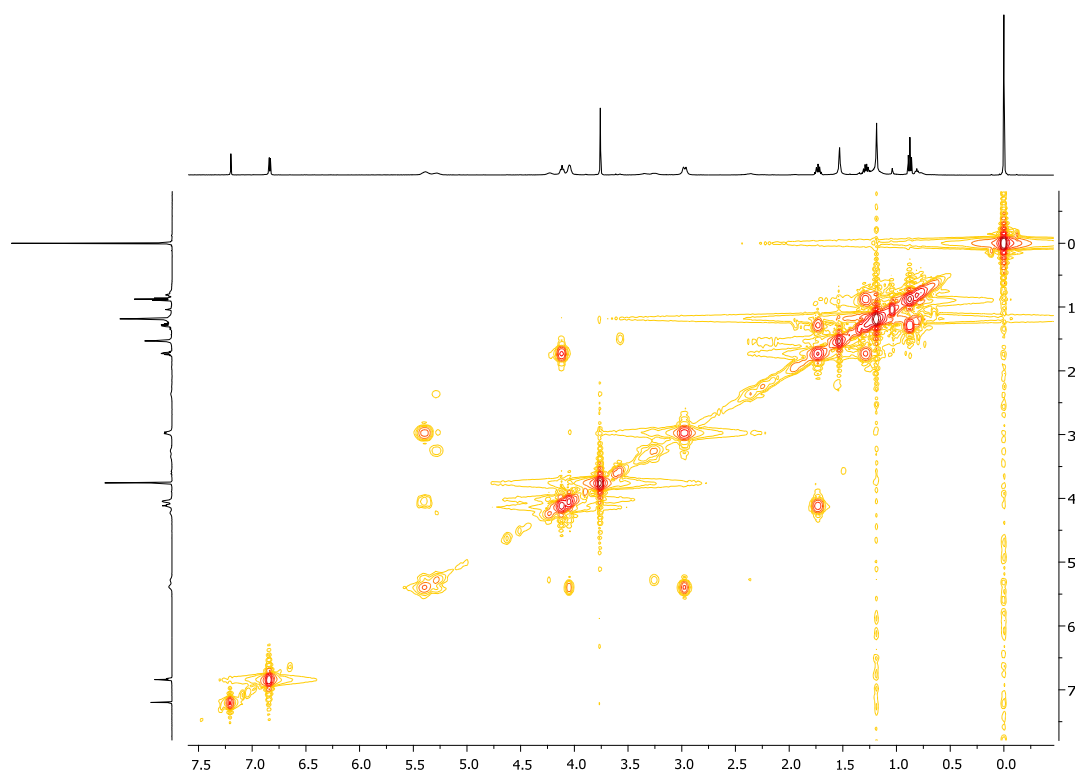

**Figure 4.** 2D COSY ( $^1\text{H}$ - $^1\text{H}$ ) NMR spectra of reaction of  $[\text{Pd}(\eta^3\text{-C}_3\text{H}_5)\text{Cl}]_2$  with IL **13** and KOAc.

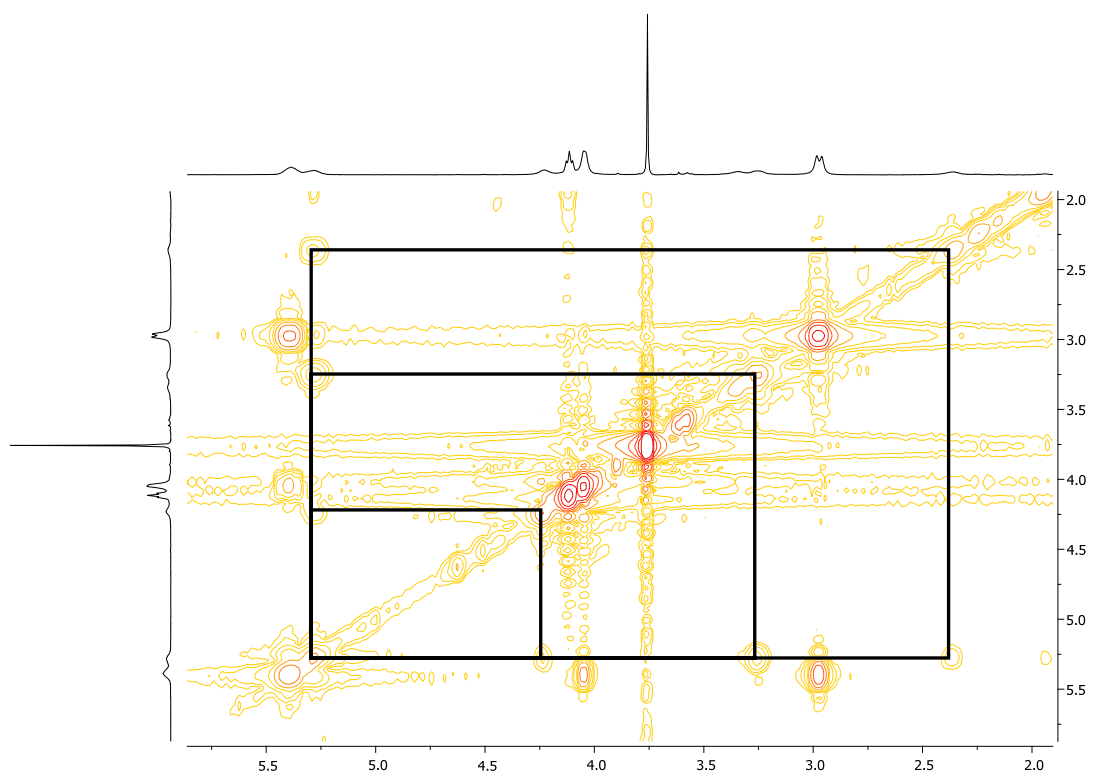

**Figure 5.** Expanded 2D COSY ( $^1\text{H}$ - $^1\text{H}$ ) NMR spectra of reaction of  $[\text{Pd}(\eta^3\text{-C}_3\text{H}_5)\text{Cl}]_2$  with IL **13** and KOAc.

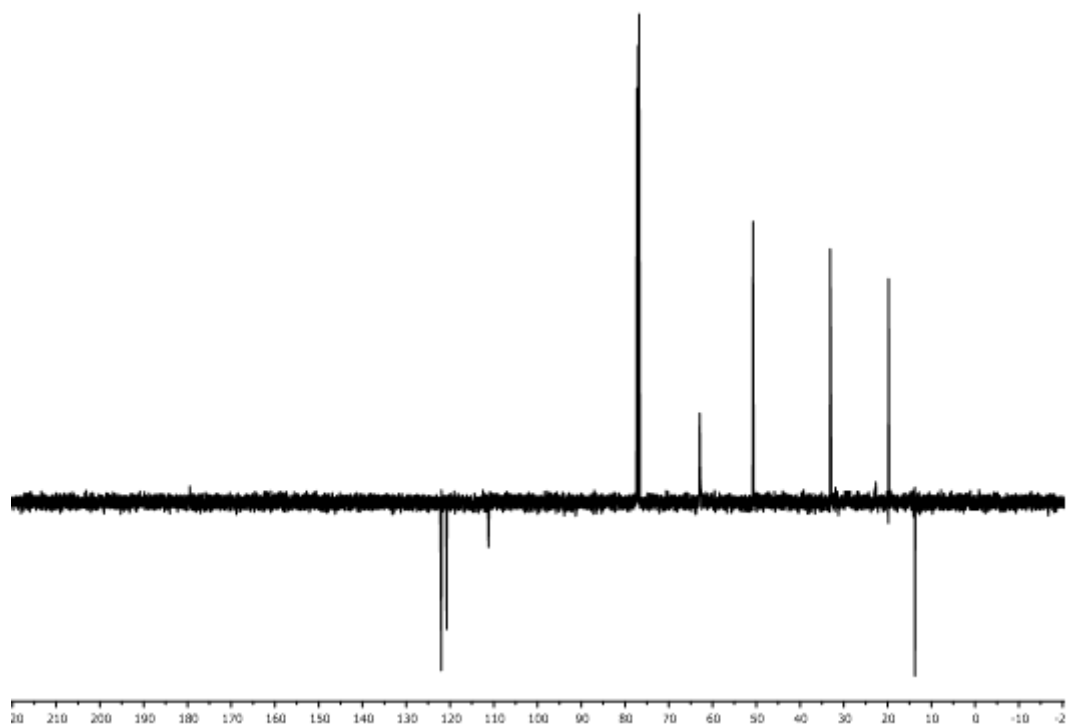

**Figure 6.**  $^{13}\text{C}$ - $\{^1\text{H}\}$  NMR spectra of reaction of  $[\text{Pd}(\eta^3\text{-C}_3\text{H}_5)\text{Cl}]_2$  with IL **13** and KOAc after crystallization with EtOAc/hexane (1:5).

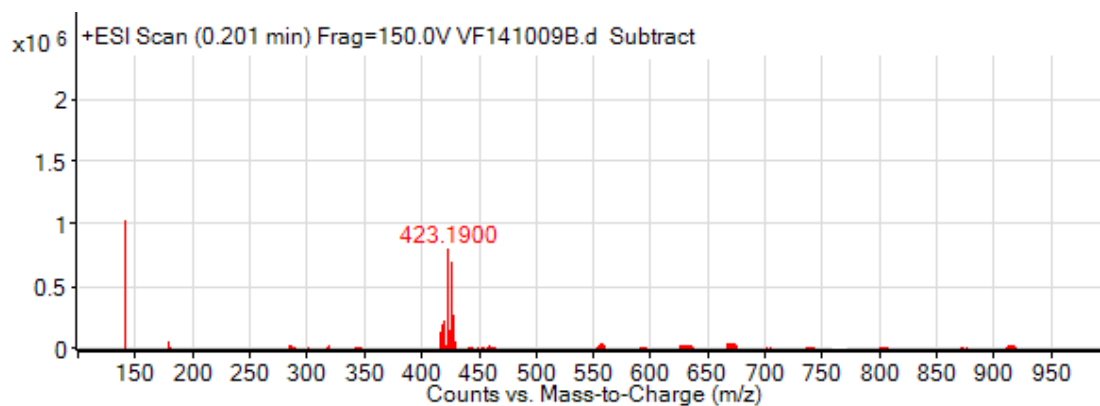

**Figure 7.** ESI-TOF chromatogram for complex 17.

**Table 1.** ESI-TOF data for complex 17.

| Peak List  |          |         |
|------------|----------|---------|
| <i>m/z</i> | <i>z</i> | Abund   |
| 139.1281   |          | 1044247 |
| 416.1202   |          | 138218  |
| 417.1185   |          | 201675  |
| 419.1188   |          | 223340  |
| 421.1830   |          | 266643  |
| 422.1908   |          | 619091  |
| 423.1900   | 1        | 818840  |
| 424.1924   | 1        | 148548  |
| 425.1897   | 1        | 689091  |
| 426.1921   | 1        | 135253  |
| 427.1905   | 1        | 291589  |
| 627.1566   |          | 978149  |
| 628.1612   |          | 2058510 |



Reactivity of ligand 3 in IL 13 under basic conditions:

Into a schlenk tube under nitrogen was introduced the palladium precursor  $[\text{Pd}(\eta^3\text{-C}_3\text{H}_5)\text{Cl}]_2$  (50 mg, 0.136 mmol) and the phosphine-imidazoline ligand **3** (0.30 mmol) in  $[\text{bmim}][\text{BF}_4]$  (2 mL). Then, KOAc (14 mg, 0.14 mmol) was introduced and the reaction mixture was heated at 45 °C for 16 hours. Then, the reaction crude was analysed by NMR and Mass spectroscopy observing a mixture of three different complexes as shown in Figure 8.

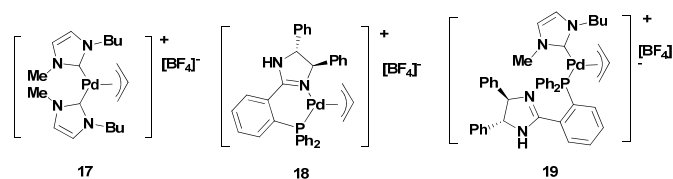

**Figure 8.** Mixture of complexes formed by reaction of ligand **3** and  $[\text{Pd}(\eta^3\text{-C}_3\text{H}_5)\text{Cl}]_2$  in ionic liquid **13** and KOAc.

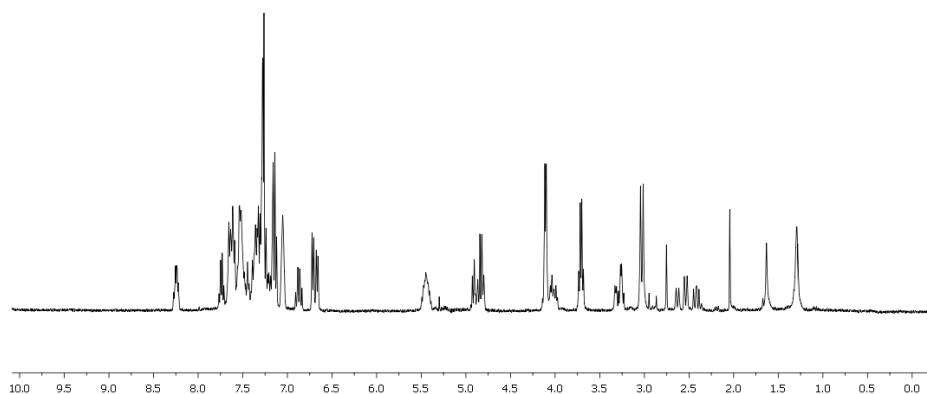

**Figure 9.**  $^1\text{H}$  NMR of complex **18** at rt.

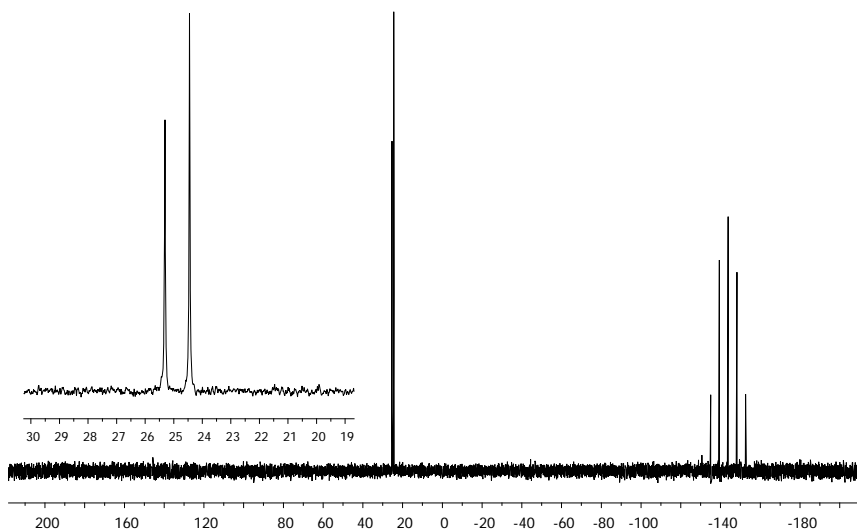

**Figure 10.**  $^{31}\text{P}\{-^1\text{H}\}$  NMR of complex **18** at rt.

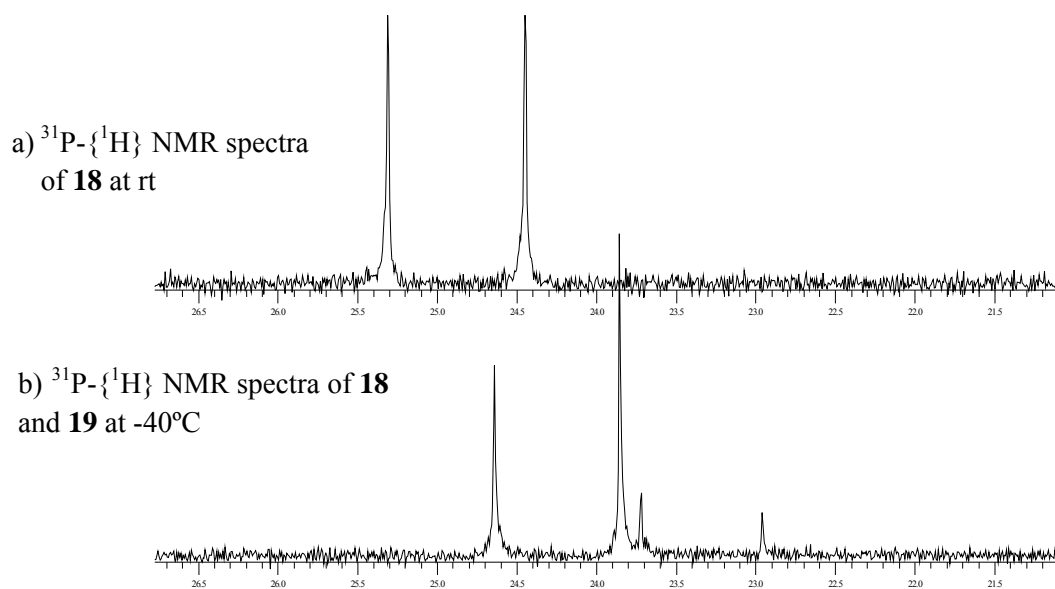

**Figure 11.**  $^{31}\text{P}\{-^1\text{H}\}$  NMR spectra: a) Isolated complex **18**; b) Complex mixture of **18** and **19** obtained by reaction of ligand **3** with  $[\text{Pd}(\eta^3\text{-C}_3\text{H}_5)\text{Cl}]_2$  in ionic liquid **13** and KOAc.

Reactivity of ligand 3 in ILs 13, 14 and 16 under basic conditions:

Into a schlenk tube under nitrogen was introduced the palladium precursor  $[\text{Pd}(\eta^3\text{-C}_3\text{H}_5)\text{Cl}]_2$  (50 mg, 0.136 mmol) and the phosphine-imidazoline ligand **3** (0.30 mmol) in 2 mL of the corresponding ionic liquid (**13**, **14** or **16**). Then, KOAc (0.14 mg, 0.14 mmol) was introduced and the reaction mixture was heated at 45 °C for 16 hours. Then, the reaction crude was analysed by NMR.

a)  $^{31}\text{P}\{-^1\text{H}\}$  NMR spectra of **18** at rt

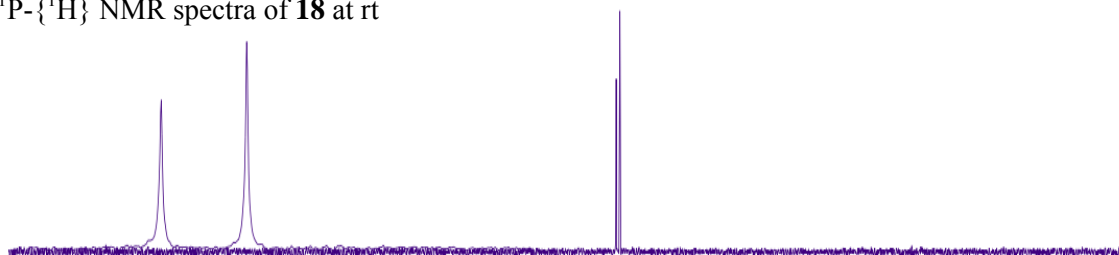

b)  $^{31}\text{P}\{-^1\text{H}\}$  NMR spectra of the mixture of complexes **18** and **19** at -40°C obtained in IL **13**

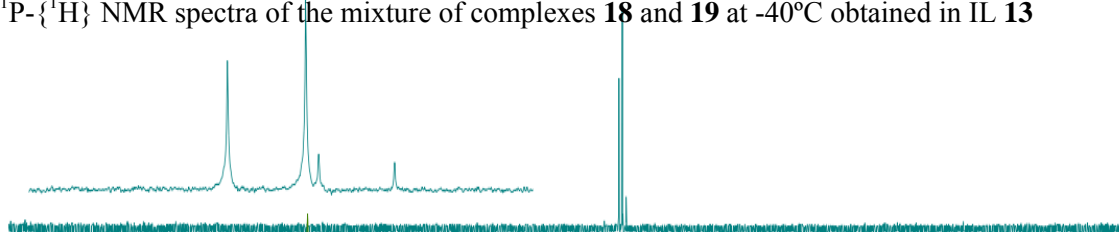

c)  $^{31}\text{P}\{-^1\text{H}\}$  NMR spectra of complex **18** in IL **16**

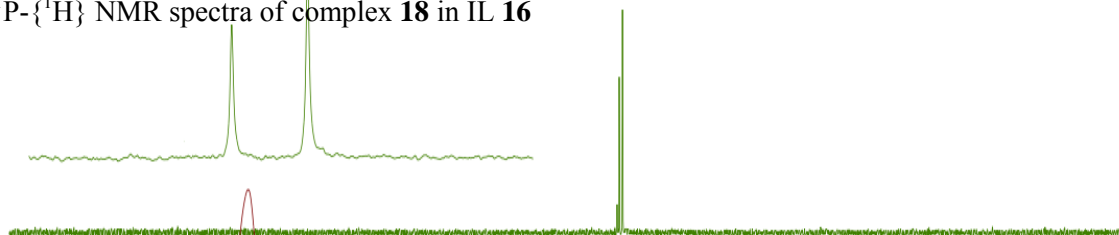

d)  $^{31}\text{P}\{-^1\text{H}\}$  NMR spectra of complex **18** in IL **14**

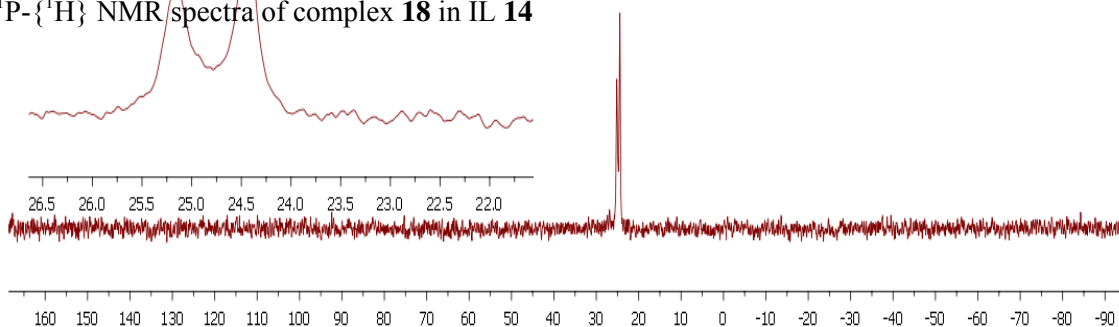

**Figure 12.**  $^{31}\text{P}\{-^1\text{H}\}$  NMR spectra: a)  $^{31}\text{P}\{-^1\text{H}\}$  NMR spectra of the isolated complex **18** at rt; b)  $^{31}\text{P}\{-^1\text{H}\}$  NMR spectra of the mixture of complexes **18** and **19** at -40°C obtained by reaction of ligand **3** and  $[\text{Pd}(\eta^3\text{-C}_3\text{H}_5)\text{Cl}]_2$  in the IL **13**; c)  $^{31}\text{P}\{-^1\text{H}\}$  NMR spectra of complex **18** obtained by reaction of ligand **3** and  $[\text{Pd}(\eta^3\text{-C}_3\text{H}_5)\text{Cl}]_2$  in the IL **16**; d)  $^{31}\text{P}\{-^1\text{H}\}$  NMR spectra of complex **18** obtained by reaction of ligand **3** and  $[\text{Pd}(\eta^3\text{-C}_3\text{H}_5)\text{Cl}]_2$  in the IL **14**.

- 
- <sup>i</sup> D. Popa, C. Puigjaner, M. Gómez, J. Benet-Buchholz, A. Vidal-Ferran, M. A. Pericàs, *Adv. Synth. Catal.* **2007**, 349, 2265.
- <sup>ii</sup> M. Zehnder, S. Schaffner, M. Neuburger, D. A. Plattner, *Inorg. Chim. Acta* **2002**, 337, 287.
- <sup>iii</sup> M. Zehnder, S. Schaffner, M. Neuburger, D. A. Plattner, *Inorg. Chim. Acta* **2002**, 337, 287.
